# Supplementary material
Source: PubMed Central journal article supplement (PMC7269350)
Supplement: ASN.2020030276SupplementaryData.pdf [file ASN.2020030276SupplementaryData.pdf]

**Supplementary Table 1. Hematuria and proteinuria in the non AKI group versus the AKI group**

| <b>Variables</b> | <b>No AKI</b>   | <b>AKI</b>    | <b><i>P</i></b>    |
|------------------|-----------------|---------------|--------------------|
| Number           | 298             | 35            |                    |
| Proteinuria      |                 |               | 0.002 <sup>a</sup> |
| none             | 110/298 (36.9%) | 4/35 (11.4%)  |                    |
| ±/+              | 158/298 (53.0%) | 24/35 (68.6%) |                    |
| ++/+++           | 30/298 (10.1%)  | 7/35 (20.0%)  |                    |
| Hematuria        |                 |               | 0.007 <sup>a</sup> |
| none             | 180/298 (58.3%) | 14/35 (40.0%) |                    |
| ±/+              | 94/298 (32.1%)  | 13/35 (37.1%) |                    |
| ++/+++           | 24/298 (9.6%)   | 8/35 (22.9%)  |                    |

Data are presented as a percentage

a. Wilcoxon rank sum test

**Supplementary Table 2. The correlation between proteinuria and variables**

| <b>Variables</b>       | <b>Spearman's rho</b> | <b>P</b> | <b>Variables</b>                 | <b>Spearman's rho</b> | <b>P</b> |
|------------------------|-----------------------|----------|----------------------------------|-----------------------|----------|
| Gender (0,1)           | -0.012                | 0.843    | Blood sugar (mmol/L)             | 0.165                 | 0.003    |
| Age (years)            | 0.161                 | 0.003    | SBP (mmHg)                       | 0.116                 | 0.034    |
| SPO2 (%)               | -0.337                | <0.001   | DBP (mmHg)                       | 0.047                 | 0.396    |
| Days from onset (days) | -0.046                | 0.405    | HsTnI (pg/mL)                    | 0.208                 | <0.001   |
| Fever (0,1)            | 0.069                 | 0.206    | NT-proBNP (pg/mL)                | 0.159                 | 0.039    |
| Cough (0,1)            | 0.040                 | 0.469    | Hematuria                        | 0.441                 | <0.001   |
| Dyspnea (0,1)          | -0.043                | 0.434    | BUN (mmol/L)                     | 0.303                 | <0.001   |
| Diarrhea (0,1)         | -0.024                | 0.662    | SCR (μmol/L)                     | 0.273                 | <0.001   |
| Hypertension (0,1)     | 0.040                 | 0.468    | AKI (0,1)                        | 0.207                 | <0.001   |
| ACEI/ARB history (0,1) | 0.009                 | 0.870    | Prothrombin time (s)             | 0.143                 | 0.011    |
| Diabetes (0,1)         | 0.111                 | 0.044    | D-dimer (mg/L)                   | 0.210                 | <0.001   |
| CRP (mg/L)             | 0.452                 | <0.001   | Neutrophils (10 <sup>9</sup> /L) | 0.211                 | <0.001   |
| ESR (mm/h)             | 0.189                 | 0.001    | Lymphocytes (10 <sup>9</sup> /L) | -0.259                | 0.001    |
| ALT (U/L)              | 0.205                 | 0.001    | Eosinophils (10 <sup>9</sup> /L) | -0.277                | <0.001   |
| AST (U/L)              | 0.409                 | <0.001   | Serum IL-10 (pg/mL)              | 0.444                 | <0.001   |
| Serum albumin (g/L)    | -0.213                | <0.001   | Serum IL-6 (pg/mL)               | 0.412                 | 0.001    |
| Serum globin (g/L)     | 0.239                 | <0.001   | Serum IL-2R (U/mL)               | 0.350                 | <0.001   |

Variables was defined as follows: Gender (0, female; 1, male); Fever (0, without fever; 1, with fever); Cough (0, without cough; 1, with cough); Dyspnea (0, without dyspnea; 1, with dyspnea); Hypertension (0, without hypertension; 1, with hypertension); ACEI/ARB (0, without ACEI/ARB treatment before the onset of the COVID-19; 1, with ACEI/ARB treatment before the onset of the COVID-19); Diabetes (0, without Diabetes; 1, with Diabetes); AKI (0, without AKI occurrence on admission or during the hospital stay; 1, with AKI occurrence on admission or during the hospital stay); SBP, systolic blood pressure; DBP, diastolic blood pressure.

**Supplementary Table 3. The correlation between hematuria and variables**

| <b>Variables</b>       | <b>Spearman's rho</b> | <b>P</b> | <b>Variables</b>                 | <b>Spearman's rho</b> | <b>P</b> |
|------------------------|-----------------------|----------|----------------------------------|-----------------------|----------|
| Gender (0,1)           | -0.012                | 0.843    | Blood sugar (mmol/L)             | 0.117                 | 0.037    |
| Age (years)            | 0.170                 | 0.002    | SBP (mmHg)                       | 0.090                 | 0.102    |
| SPO2 (%)               | -0.189                | 0.001    | DBP (mmHg)                       | 0.036                 | 0.512    |
| Days from onset (days) | 0.017                 | 0.763    | HsTnI (pg/mL)                    | 0.325                 | <0.001   |
| Fever (0,1)            | 0.131                 | 0.017    | NT-proBNP (pg/mL)                | 0.287                 | <0.001   |
| Cough (0,1)            | 0.046                 | 0.405    | Proteinuria                      | 0.441                 | <0.001   |
| Dyspnea (0,1)          | -0.001                | 0.981    | BUN (mmol/L)                     | 0.202                 | <0.001   |
| Diarrhea (0,1)         | -0.024                | 0.662    | SCR (μmol/L)                     | 0.171                 | 0.002    |
| Hypertension (0,1)     | 0.021                 | 0.709    | AKI (0,1)                        | 0.162                 | 0.003    |
| ACEI/ARB history (0,1) | -0.009                | 0.874    | Prothrombin time (s)             | 0.148                 | 0.008    |
| Diabetes (0,1)         | 0.139                 | 0.012    | D-dimer (mg/L)                   | 0.141                 | 0.013    |
| CRP (mg/L)             | 0.252                 | <0.001   | Neutrophils (10 <sup>9</sup> /L) | 0.128                 | 0.019    |
| ESR (mm/h)             | 0.079                 | 0.163    | Lymphocytes (10 <sup>9</sup> /L) | -0.180                | 0.001    |
| ALT (U/L)              | 0.031                 | 0.065    | Eosinophils (10 <sup>9</sup> /L) | -0.248                | <0.001   |
| AST (U/L)              | 0.187                 | 0.002    | Serum IL-10 (pg/mL)              | 0.284                 | <0.001   |
| Serum albumin (g/L)    | -0.152                | 0.005    | Serum IL-6 (pg/mL)               | 0.248                 | 0.001    |
| Serum globin (g/L)     | 0.066                 | 0.230    | Serum IL-2R (U/mL)               | 0.228                 | 0.004    |

Variables was defined as follows: Gender (0, female; 1, male,); Fever (0, without fever; 1, with fever); Cough (0,without cough; 1, with cough); Dyspnea (0,without dyspnea; 1, with dyspnea); Hypertension (0, without hypertension; 1, with hypertension); ACEI/ARB treatment history (0, without ACEI/ARB treatment before the onset of the COVID-19; 1, with ACEI/ARB treatment before the onset of the COVID-19); Diabetes (0, without Diabetes; 1, with Diabetes); AKI (0, without AKI occurrence on admission or during the hospital stay;1, with AKI occurrence on admission or during the hospital stay); SBP, systolic blood pressure; DBP, diastolic blood pressure.

**Supplementary Table 4. The correlation between AKI occurrence and variables**

| <b>Variables</b>       | <b>Spearman's rho</b> | <b>P</b> | <b>Variables</b>                 | <b>Spearman's rho</b> | <b>P</b> |
|------------------------|-----------------------|----------|----------------------------------|-----------------------|----------|
| Gender (0,1)           | 0.056                 | 0.304    | Blood sugar (mmol/L)             | 0.194                 | 0.001    |
| Age (years)            | 0.200                 | <0.001   | SBP (mmHg)                       | 0.109                 | 0.046    |
| SPO2 (%)               | -0.195                | <0.001   | DBP (mmHg)                       | 0.025                 | 0.654    |
| Days from onset (days) | 0.010                 | 0.860    | HsTnl (pg/mL)                    | 0.301                 | <0.001   |
| Fever (0,1)            | 0.012                 | 0.333    | NT-proBNP (pg/mL)                | 0.278                 | <0.001   |
| Cough (0,1)            | 0.020                 | 0.721    | Proteinuria                      | 0.207                 | <0.001   |
| Dyspnea (0,1)          | -0.039                | 0.479    | Hematuria                        | 0.162                 | 0.003    |
| Diarrhea (0,1)         | 0.097                 | 0.076    | BUN (mmol/L)                     | 0.342                 | <0.001   |
| Hypertension (0,1)     | 0.099                 | 0.332    | SCR (μmol/L)                     | 0.256                 | <0.001   |
| ACEI/ARB history (0,1) | 0.155                 | 0.005    | Prothrombin time (s)             | 0.072                 | 0.320    |
| Diabetes (0,1)         | 0.140                 | 0.011    | D-dimer (mg/L)                   | 0.247                 | <0.001   |
| CRP (mg/L)             | 0.193                 | <0.001   | Neutrophils (10 <sup>9</sup> /L) | 0.239                 | <0.001   |
| ESR (mm/h)             | 0.077                 | 0.316    | Lymphocytes (10 <sup>9</sup> /L) | -0.197                | <0.001   |
| ALT (U/L)              | 0.104                 | 0.041    | Eosinophils (10 <sup>9</sup> /L) | -0.160                | 0.003    |
| AST (U/L)              | 0.194                 | 0.001    | Serum IL-10 (pg/mL)              | 0.137                 | 0.084    |
| Serum albumin (g/L)    | -0.133                | 0.016    | Serum IL-6 (pg/mL)               | 0.199                 | 0.010    |
| Serum globin (g/L)     | 0.114                 | 0.038    | Serum IL-2R (U/mL)               | 0.287                 | <0.001   |

Variables was defined as follows: Gender (0, female; 1, male,); Fever (0, without fever; 1, with fever); Cough (0, without cough; 1, with cough); Dyspnea (0, without dyspnea; 1, with dyspnea); Hypertension (0, without hypertension; 1, with hypertension); ACEI/ARB treatment history (0, without ACEI/ARB treatment before the onset of the COVID-19; 1, with ACEI/ARB treatment before the onset of the COVID-19); Diabetes (0, without Diabetes; 1, with Diabetes); SBP, systolic blood pressure; DBP, diastolic blood pressure.

**Supplementary Table 5. Baseline and treatment characteristics among participants in the Follow-up Study (N=198)**

| <b>Variables</b>                               | <b>Patients</b> |
|------------------------------------------------|-----------------|
| Age (years)                                    | 57.1±13.4       |
| Male patient, %                                | 113/198 (57.1%) |
| SCR (µmol/L)                                   | 74 (61-89)      |
| COVID-19 grade                                 |                 |
| Moderate                                       | 63 (31.8%)      |
| Severe                                         | 98 (49.5%)      |
| Critically ill                                 | 37 (18.7%)      |
| Hypertension, %                                | 64/198 (32.3%)  |
| ACEI/ARB treatment history, %                  | 21/188 (11.2%)  |
| Diabetes, %                                    | 46/198 (23.2%)  |
| Days from admission to follow-up               | 12.0 (10.5-15)  |
| Antibiotic treatment, %                        | 168/198 (84.8%) |
| Arbidol treatment, %                           | 139/198 (70.2%) |
| Lopinavir/ritonavir treatment, %               | 46/198 (23.2%)  |
| Ribavirin treatment, %                         | 2/198 (1.0%)    |
| Remdesivir treatment, %                        | 10/198 (5.1%)   |
| Glucocorticoids treatment, %                   | 142/198 (71.7%) |
| Intravenous immunoglobulin therapy, %          | 74/198 (37.4%)  |
| Ventilator aid respiration, %                  | 37/198 (18.7%)  |
| Continuous renal replacement therapy (CRRT), % | 6/198 (3.0%)    |

Data are presented as mean ± SD or median (25th–75th percentiles) or a percentage.

**Supplementary Table 6. Risk factors associated with proteinuria remission during follow-up periods**

| Variable                                                       | Univariate analysis |                        |                  | Multivariate analysis <sup>h</sup> |                         |                  |
|----------------------------------------------------------------|---------------------|------------------------|------------------|------------------------------------|-------------------------|------------------|
|                                                                | OR                  | 95% CI                 | P                | OR                                 | 95% CI                  | P                |
| <b>Age (60 or above vs under 60) (n=162)</b>                   | <b>0.199</b>        | <b>(0.063, 0.626)</b>  | <b>0.006</b>     | <b>0.119</b>                       | <b>(0.020, 0.701)</b>   | <b>0.019</b>     |
| Gender (male vs female) (n=162)                                | 0.966               | (0.371, 2.509)         | 0.943            |                                    |                         |                  |
| AKI (yes vs no) <sup>a</sup> (n=162)                           | 0.073               | (0.023, 0.227)         | <0.001           |                                    |                         |                  |
| Change of eosinophils count (1 vs 0) <sup>b</sup> (n=150)      | 2.601               | (0.927, 7.299)         | 0.069            |                                    |                         |                  |
| Change of lymphocytes count (1 vs 0) <sup>c</sup> (n=153)      | 4.145               | (1.484, 11.579)        | 0.007            |                                    |                         |                  |
| <b>CRP grade (1 vs 0)<sup>d</sup> (n=131)</b>                  | <b>9.895</b>        | <b>(3.304, 29.636)</b> | <b>&lt;0.001</b> | <b>9.203</b>                       | <b>(1.616, 52.413)</b>  | <b>0.012</b>     |
| Hypertension (with vs without) (n=162)                         | 0.531               | (0.205, 1.374)         | 0.192            |                                    |                         |                  |
| <b>ACEI/ARB treatment history (1 vs 0)<sup>e</sup> (n=152)</b> | <b>0.228</b>        | <b>(0.068, 0.761)</b>  | <b>0.016</b>     | <b>0.076</b>                       | <b>(0.008, 0.684)</b>   | <b>0.021</b>     |
| Diarrhea (with vs without) (n=162)                             | 0.464               | (0.180, 1.194)         | 0.111            |                                    |                         |                  |
| Diabetes (with vs without) (n=162)                             | 0.214               | (0.080, 0.568)         | 0.002            |                                    |                         |                  |
| Days from onset (n=162)                                        | 1.054               | (0.917, 1.212)         | 0.460            |                                    |                         |                  |
| Glucocorticoids treatment (with vs without) (n=162)            | 0.420               | (0.117, 1.510)         | 0.184            |                                    |                         |                  |
| Antibiotic treatment (with vs without) (n=162)                 | 0.868               | (0.236, 3.195)         | 0.831            |                                    |                         |                  |
| Arbidol treatment (with vs without) (n=162)                    | 1.216               | (0.435, 3.397)         | 0.709            |                                    |                         |                  |
| Intravenous immunoglobulin therapy (with vs without) (n=162)   | 0.405               | (0.157, 1.044)         | 0.061            |                                    |                         |                  |
| Bladder catheter (with vs without) (n=162)                     | 0.063               | (0.020, 0.203)         | <0.001           |                                    |                         |                  |
| <b>COVID-19 grade (reference=Critically ill) (n=162)</b>       |                     |                        | <b>&lt;0.001</b> |                                    |                         | <b>0.002</b>     |
| Moderate (n=47)                                                | 11.727              | (3.161, 43.512)        | <0.001           | 4.081                              | (0.583, 28.550)         | 0.156            |
| <b>Severe (n=92)</b>                                           | <b>24.000</b>       | <b>(6.583, 87.500)</b> | <b>&lt;0.001</b> | <b>41.184</b>                      | <b>(5.360, 316.443)</b> | <b>&lt;0.001</b> |
| Change of serum albumin (1 vs 0) <sup>f</sup> (n=135)          | 2.645               | (0.886, 7.892)         | 0.081            |                                    |                         |                  |
| Recovery of lung (1 vs 0) <sup>g</sup> (n=145)                 | 3.387               | (1.100, 10.432)        | 0.034            |                                    |                         |                  |

- a. AKI (yes, with AKI occurrence on admission or during the hospital stay; no, without AKI occurrence on admission or during the hospital stay).
- b. Change of eosinophils count (reexamined eosinophils was compared with initial eosinophils, 0, decreased or did not change; 1, increased)
- c. Change of lymphocytes count (reexamined lymphocytes was compared with initial lymphocytes, 0, decreased or did not change; 1, increased)
- d. CRP on follow-up (1, < or = 10mg/l; 0, >10mg/l)
- e. 1, with ACEI or ARB treatment before the onset of the COVID-19; 0 without ACEI or ARB treatment before the onset of the COVID-19
- f. Change of serum albumin (reexamined serum albumin was compared with initial serum albumin, 0, decreased; 1, increased or did not change)
- g. Recovery of lung (reexamined degree of lung involvement was compared with initial degree of lung involvement, 0, no obvious recovery; 1, obvious recovery)
- h. The number of cases included in the final multivariate logistic regression model is 120.

**Supplementary Table 7. Risk factors associated with hematuria remission during follow-up periods**

| Variable                                                      | Univariate analysis |                        |                  | Multivariate analysis <sup>h</sup> |                        |              |
|---------------------------------------------------------------|---------------------|------------------------|------------------|------------------------------------|------------------------|--------------|
|                                                               | OR                  | 95% CI                 | P                | OR                                 | 95% CI                 | P            |
| <b>Age (60 or above vs under 60) (n=102)</b>                  | <b>0.305</b>        | <b>(0.119, 0.780)</b>  | <b>0.013</b>     | <b>0.276</b>                       | <b>(0.084, 0.903)</b>  | <b>0.033</b> |
| Gender (male vs female) (n=102)                               | 2.144               | (0.882, 5.209)         | 0.092            |                                    |                        |              |
| <b>AKI (yes vs no)<sup>a</sup> (n=102)</b>                    | <b>0.076</b>        | <b>(0.019, 0.305)</b>  | <b>&lt;0.001</b> | <b>0.117</b>                       | <b>(0.017, 0.813)</b>  | <b>0.030</b> |
| Change of eosinophils count (1 vs 0) <sup>b</sup> (n=94)      | 1.930               | (0.685, 5.436)         | 0.213            |                                    |                        |              |
| Change of lymphocytes count (1 vs 0) <sup>c</sup> (n=96)      | 2.211               | (0.806, 6.062)         | 0.123            |                                    |                        |              |
| CRP grade (1 vs 0) <sup>d</sup> (n=86)                        | 2.210               | (0.834, 5.854)         | 0.111            |                                    |                        |              |
| Hypertension (with vs without) (n=102)                        | 0.572               | (0.229, 1.430)         | 0.232            |                                    |                        |              |
| <b>ACEI/ARB treatment history (1 vs 0)<sup>e</sup> (n=96)</b> | <b>0.159</b>        | <b>(0.037, 0.692)</b>  | <b>0.014</b>     | <b>0.106</b>                       | <b>(0.015, 0.725)</b>  | <b>0.022</b> |
| Diarrhea (with vs without) (n=102)                            | 0.370               | (0.150, 0.912)         | 0.031            |                                    |                        |              |
| Diabetes (with vs without) (n=102)                            | 0.782               | (0.304, 2.011)         | 0.610            |                                    |                        |              |
| Days from onset (n=102)                                       | 1.075               | (0.941, 1.228)         | 0.290            |                                    |                        |              |
| Glucocorticoids treatment (with vs without) (n=102)           | 1.873               | (0.746, 4.702)         | 0.181            |                                    |                        |              |
| Antibiotic treatment (with vs without) (n=102)                | 0.514               | (0.136, 1.947)         | 0.328            |                                    |                        |              |
| Arbidol treatment (with vs without) (n=102)                   | 1.120               | (0.439, 2.857)         | 0.813            |                                    |                        |              |
| Intravenous immunoglobulin therapy (with vs without) (n=102)  | 1.160               | (0.470, 2.862)         | 0.747            |                                    |                        |              |
| Bladder catheter (with vs without) (n=102)                    | 0.103               | (0.029, 0.366)         | <0.001           |                                    |                        |              |
| <b>COVID-19 grade (reference=Critically ill) (n=102)</b>      |                     |                        | <b>0.001</b>     |                                    |                        | <b>0.011</b> |
| Moderate (n=34)                                               | 3.467               | (1.125, 10.682)        | 0.030            | 1.050                              | (0.205, 5.385)         | 0.953        |
| <b>Severe (n=46)</b>                                          | <b>11.844</b>       | <b>(3.364, 41.702)</b> | <b>&lt;0.001</b> | <b>9.159</b>                       | <b>(1.526, 54.973)</b> | <b>0.015</b> |
| Change of serum albumin (1 vs 0) <sup>f</sup> (n=86)          | 1.227               | (0.488, 3.088)         | 0.664            |                                    |                        |              |
| Recovery of lung (1 vs 0) <sup>g</sup> (n=91)                 | 1.298               | (0.485, 3.472)         | 0.603            |                                    |                        |              |

- a. AKI (yes, with AKI occurrence on admission or during the hospital stay; no, without AKI occurrence on admission or during the hospital stay).
- b. Change of eosinophils count (reexamined eosinophils was compared with initial eosinophils, 0, decreased or did not change; 1, increased)
- c. Change of lymphocytes count (reexamined lymphocytes was compared with initial lymphocytes, 0, decreased or did not change; 1, increased)
- d. CRP on follow-up (1, < or = 10mg/l; 0, >10mg/l)
- e. 1, with ACEI or ARB treatment before the onset of the COVID-19; 0 without ACEI or ARB treatment before the onset of the COVID-19
- f. Change of serum albumin (reexamined serum albumin was compared with initial serum albumin, 0, decreased; 1, increased or did not change)
- g. Recovery of lung (reexamined degree of lung involvement was compared with initial degree of lung involvement, 0, no obvious recovery; 1, obvious recovery)
- h. The number of cases included in the final multivariate logistic regression model is 96.

**Supplementary Table 8. Risk factors associated with AKI recovery during follow-up periods**

| Variable                                                                | Univariate analysis |                       |              | Multivariate analysis <sup>f</sup> |                       |              |
|-------------------------------------------------------------------------|---------------------|-----------------------|--------------|------------------------------------|-----------------------|--------------|
|                                                                         | OR                  | 95% CI                | P            | OR                                 | 95% CI                | P            |
| Age (60 or above vs under 60) (n=35)                                    | 1.212               | (0.311, 4.730)        | 0.782        |                                    |                       |              |
| Gender (male vs female) (n=35)                                          | 0.357               | (0.087, 1.471)        | 0.154        |                                    |                       |              |
| Change of eosinophils count (1 vs 0) <sup>a</sup> (n=32)                | 1.145               | (0.270, 4.867)        | 0.854        |                                    |                       |              |
| Change of lymphocytes count (1 vs 0) <sup>b</sup> (n=34)                | 1.270               | (0.327, 4.930)        | 0.730        |                                    |                       |              |
| Hypertension (with vs without) (n=35)                                   | 0.864               | (0.227, 3.289)        | 0.831        |                                    |                       |              |
| ACEI/ARB treatment history (1 vs 0) <sup>c</sup> (n=35)                 | 1.705               | (0.370, 7.854)        | 0.494        |                                    |                       |              |
| Diarrhea (with vs without) (n=35)                                       | 0.540               | (0.139, 2.093)        | 0.373        |                                    |                       |              |
| Diabetes (with vs without) (n=35)                                       | 0.825               | (0.211, 3.219)        | 0.782        |                                    |                       |              |
| Glucocorticoids treatment (with vs without) (n=34)                      | 0.361               | (0.030, 4.418)        | 0.425        |                                    |                       |              |
| Arbidol treatment (with vs without) (n=35)                              | 0.583               | (0.151, 2.256)        | 0.435        |                                    |                       |              |
| <b>COVID-19 grade (Critical ill vs Non-critical)<sup>d</sup> (n=35)</b> | <b>0.033</b>        | <b>(0.004, 0.317)</b> | <b>0.003</b> | <b>0.033</b>                       | <b>(0.004, 0.317)</b> | <b>0.003</b> |
| Change of serum albumin (1 vs 0) <sup>e</sup> (n=32)                    | 0.709               | (0.137, 3.660)        | 0.681        |                                    |                       |              |
| Severity of AKI (stage 2+3 vs stage 1) (n=35)                           | 0.089               | (0.018, 0.432)        | 0.003        |                                    |                       |              |
| Baseline creatinine (n=35)                                              | 0.995               | (0.959, 1.031)        | 0.995        |                                    |                       |              |

a. Change of eosinophils count (reexamined eosinophils was compared with initial eosinophils, 0, decreased or did not change; 1, increased)

b. Change of lymphocytes count (reexamined lymphocytes was compared with initial lymphocytes, 0, decreased or did not change; 1, increased)

c. 1, with ACEI or ARB treatment before the onset of the COVID-19; 0 without ACEI or ARB treatment before the onset of the COVID-19

d. Among the 35 AKI patients, only 5 patients' COVID-19 grades were moderate and 6 patients' COVID-19 grades were severe. So these two levels were merged into a new level, i.e., non-critically.

e. Change of serum albumin (reexamined serum albumin was compared with initial serum albumin, 0, decreased; 1, increased or did not change)

f. The number of cases included in the final multivariate logistic regression model is 35.



**Supplementary Table 9. Characteristics of patients lost to follow-up and patients with follow-up**

| <b>Variables</b>                 | <b>Patients lost to follow-up</b> | <b>Patients with follow-up</b> | <b>P</b>           |
|----------------------------------|-----------------------------------|--------------------------------|--------------------|
| Number                           | 53                                | 163                            |                    |
| SPO2                             | 95 (92-98)                        | 93 (91-96)                     | 0.165 <sup>a</sup> |
| Male patient, %                  | 32/53 (60.4%)                     | 91/163 (55.8%)                 | 0.561 <sup>b</sup> |
| Age                              | 56.9±13.7                         | 55.6±13.4                      | 0.544 <sup>c</sup> |
| Days from onset                  | 8 (7-10)                          | 9 (7-11)                       | 0.369 <sup>a</sup> |
| Fever, %                         | 49/53 (92.5%)                     | 148/163 (90.8%)                | 0.712 <sup>b</sup> |
| Cough, %                         | 38/53 (71.7%)                     | 115/163 (70.6%)                | 0.077 <sup>b</sup> |
| Dyspnea, %                       | 22/53 (41.5%)                     | 97/163 (59.5%)                 | 0.022 <sup>b</sup> |
| Diarrhea, %                      | 16/53 (30.2%)                     | 48/163 (29.4%)                 | 0.918 <sup>b</sup> |
| Hypertension, %                  | 19/52 (36.5%)                     | 47/163 (28.8%)                 | 0.294 <sup>b</sup> |
| ACEI/ARB history, %              | 6/52 (11.5%)                      | 12/153 (7.8%)                  | 0.416 <sup>b</sup> |
| Diabetes, %                      | 15/52 (28.8%)                     | 32/163 (19.6%)                 | 0.162 <sup>b</sup> |
| Blood sugar (mmol/L)             | 6.6 (5.9-7.7)                     | 6.6 (5.7-8.1)                  | 0.696 <sup>a</sup> |
| SBP (mmHg)                       | 125 (116-134)                     | 127 (115-140)                  | 0.461 <sup>a</sup> |
| DBP (mmHg)                       | 78 (73-91)                        | 78 (73-87)                     | 0.560 <sup>a</sup> |
| BUN                              | 4.1 (3.4-5.8)                     | 4.3 (3.4-5.4)                  | 0.705 <sup>a</sup> |
| SCR                              | 72.0 (56.5-82.0)                  | 71.0 (60.0-84.0)               | 0.684 <sup>a</sup> |
| Lymphocytes (10 <sup>9</sup> /L) | 0.81 (0.63-1.17)                  | 0.85 (0.62-1.18)               | 0.594 <sup>a</sup> |
| Eosinophils (10 <sup>9</sup> /L) | 0.00 (0.00-0.07)                  | 0.00 (0.00-0.06)               | 0.538 <sup>a</sup> |

Data are presented as a percentage or mean ± SD or median (25th–75th percentiles), eosinophils are presented as median (5th–95th percentiles)

a. Wilcoxon rank sum test; b. Chi-square test; c. *t* test

SBP, systolic diastolic blood pressure; DBP, diastolic blood pressure.

**Supplementary Table 10. Comparison of un-reported patients in this cohort and the overlapped patients in a previous cohort**

| Variables                        | Un-reported patients | Reported patients | P                  |
|----------------------------------|----------------------|-------------------|--------------------|
| Number                           | 79                   | 254               |                    |
| SPO2                             | 95 (92-97)           | 93 (91-97)        | 0.165 <sup>a</sup> |
| Male patient, %                  | 48/79 (60.8%)        | 134/254 (52.8%)   | 0.212 <sup>b</sup> |
| Age                              | 54.1±13.5            | 56.8±13.3         | 0.112 <sup>c</sup> |
| Days from onset                  | 7 (5-10)             | 9 (7-12)          | 0.028 <sup>a</sup> |
| Fever, %                         | 66/79 (83.5%)        | 235/254 (92.5%)   | 0.018 <sup>b</sup> |
| Cough, %                         | 54/79 (68.4%)        | 175/254 (68.9%)   | 0.928 <sup>b</sup> |
| Dyspnea, %                       | 40/79 (50.6%)        | 150/254 (59.1%)   | 0.187 <sup>b</sup> |
| Diarrhea, %                      | 31/79 (39.2%)        | 77/254 (30.3%)    | 0.139 <sup>b</sup> |
| Hypertension, %                  | 26/79 (32.9%)        | 81/253 (32.0%)    | 0.882 <sup>b</sup> |
| ACEI/ARB history, %              | 11/79 (14.1%)        | 26/243 (10.7%)    | 0.413 <sup>b</sup> |
| Diabetes, %                      | 15/79 (19.0%)        | 61/253 (24.1%)    | 0.344 <sup>b</sup> |
| Blood sugar (mmol/L)             | 6.5 (5.7-7.8)        | 6.6 (5.6-8.6)     | 0.696 <sup>a</sup> |
| SBP (mmHg)                       | 124 (115-135)        | 128 (116-140)     | 0.066 <sup>a</sup> |
| DBP (mmHg)                       | 78 (70-86)           | 79 (73-87)        | 0.191 <sup>a</sup> |
| BUN                              | 4.1 (3.4-5.8)        | 4.3 (3.4-5.4)     | 0.497 <sup>a</sup> |
| SCR                              | 76.0 (58.0-85.0)     | 68.0 (56.0-84.0)  | 0.144 <sup>a</sup> |
| Lymphocytes (10 <sup>9</sup> /L) | 0.81 (0.59-1.25)     | 0.83 (0.60-1.18)  | 0.823 <sup>a</sup> |
| Eosinophils (10 <sup>9</sup> /L) | 0.00 (0.00-0.09)     | 0.00 (0.00-0.07)  | 0.323 <sup>a</sup> |
| Proteinuria                      |                      |                   | 0.132 <sup>a</sup> |
| none                             | 34/79 (43.0%)        | 80/254 (31.5%)    |                    |
| ±/+                              | 36/79 (45.6%)        | 146/254 (57.5%)   |                    |
| ++/+++                           | 9/79 (11.4%)         | 28/254 (11.0%)    |                    |
| Hematuria                        |                      |                   | 0.593 <sup>a</sup> |
| none                             | 49/79 (62.0%)        | 145/254 (57.1%)   |                    |
| ±/+                              | 21/79 (26.6%)        | 86/254 (33.9%)    |                    |
| ++/+++                           | 9/79 (11.4%)         | 23/254 (9.1%)     |                    |
| AKI                              | 11/79 (13.9%)        | 24/254 (9.4%)     | 0.257 <sup>b</sup> |

Data are presented as a percentage or mean ± SD or median (25th–75th percentiles), eosinophils are presented as median (5th–95th percentiles)

a. Wilcoxon rank sum test; b. Chi-square test; c. *t* test;

SBP, systolic diastolic blood pressure; DBP, diastolic blood pressure.

**Note:** This study has some overlap with a recently published research with Kidney International (reference 12). However, our data collection was carried out independently to the KI study, and we were able to access a distinct group of patients. In our study, 254 patients in the total of 333 patients and 165 in the 198 patients with follow-up were included in the KI cohort (reference 12). The fact is that the Tongji Hospital System has three different branches: Main Campus, Optical Valley, and Sino-French New City, respectively. The data in the KI paper were collected via the remote HIS system by the physicians who worked in the Main Campus, while the data in this paper was collected via the local HIS system by the physicians who worked in the Sino-French New City branch of Tongji Hospital. Sino-French New City

branch has been the main site of admission of COVID-19 patients under Tongji Hospital System. In addition, it is also the main site for the National Health Commission of China dispatched medical corps from other provinces. Two wards of the branch (100 beds) were exclusively managed by these medical corps in the early stage. It should be noted that there are rigorous regulations for the authorization of use of medical data in Tongji Hospital. The physicians assigned to this branch, including these medical corps, could only access to the local HIS system to collect medical data after rigorous application, including the data generated from the wards charged by these medical corps. Although the physicians who wrote the KI paper had access to the local HIS system, they did not obtain the data from these two wards at the point of preparing the KI study. Due to the access issue described above, 79 patients including 16 of the 35 AKI patients and 63 of the 298 non-AKI patients treated in these two wards were included in our study but not the KI study.

**Supplementary Table 11. Mortality of the patients with renal involvement during follow-up periods**

| <b>Variables</b>  | <b>All patients</b> | <b>Survivor</b> | <b>Death</b>   | <b><i>P</i></b>     |
|-------------------|---------------------|-----------------|----------------|---------------------|
| Proteinuria       |                     |                 |                | 0.005 <sup>a</sup>  |
| none              | 114/333 (34.2%)     | 112/114 (98.2%) | 2/114 (1.8%)   |                     |
| ±/+               | 182/333 (54.6%)     | 160/182 (87.9%) | 22/182 (12.1%) |                     |
| ++/+++            | 37/333 (11.1%)      | 32/37 (86.5%)   | 5/37 (13.5%)   |                     |
| Hematuria         |                     |                 |                | <0.001 <sup>a</sup> |
| none              | 194/333 (58.3%)     | 185/194 (95.4%) | 9/194 (4.6%)   |                     |
| ±/+               | 107/333 (32.1%)     | 97/107 (90.7%)  | 10/107 (9.3%)  |                     |
| ++/+++            | 32/333 (9.6%)       | 22/32 (68.7%)   | 10/32 (31.3%)  |                     |
| AKI               |                     |                 |                | <0.001 <sup>b</sup> |
| without           | 298/333 (89.5%)     | 289/298 (97.0%) | 9/298 (3.0%)   |                     |
| with              | 35/333 (10.5%)      | 15/35 (42.9%)   | 20/35 (57.1%)  |                     |
| Renal involvement |                     |                 |                | 0.006 <sup>b</sup>  |
| without           | 82/333 (24.5%)      | 81/82 (98.8%)   | 1/82 (1.2%)    |                     |
| with              | 251/333 (75.5%)     | 223/251 (88.8%) | 28/251 (11.2%) |                     |

Data are presented as a percentage

a. Wilcoxon rank sum test; b. Chi-square test

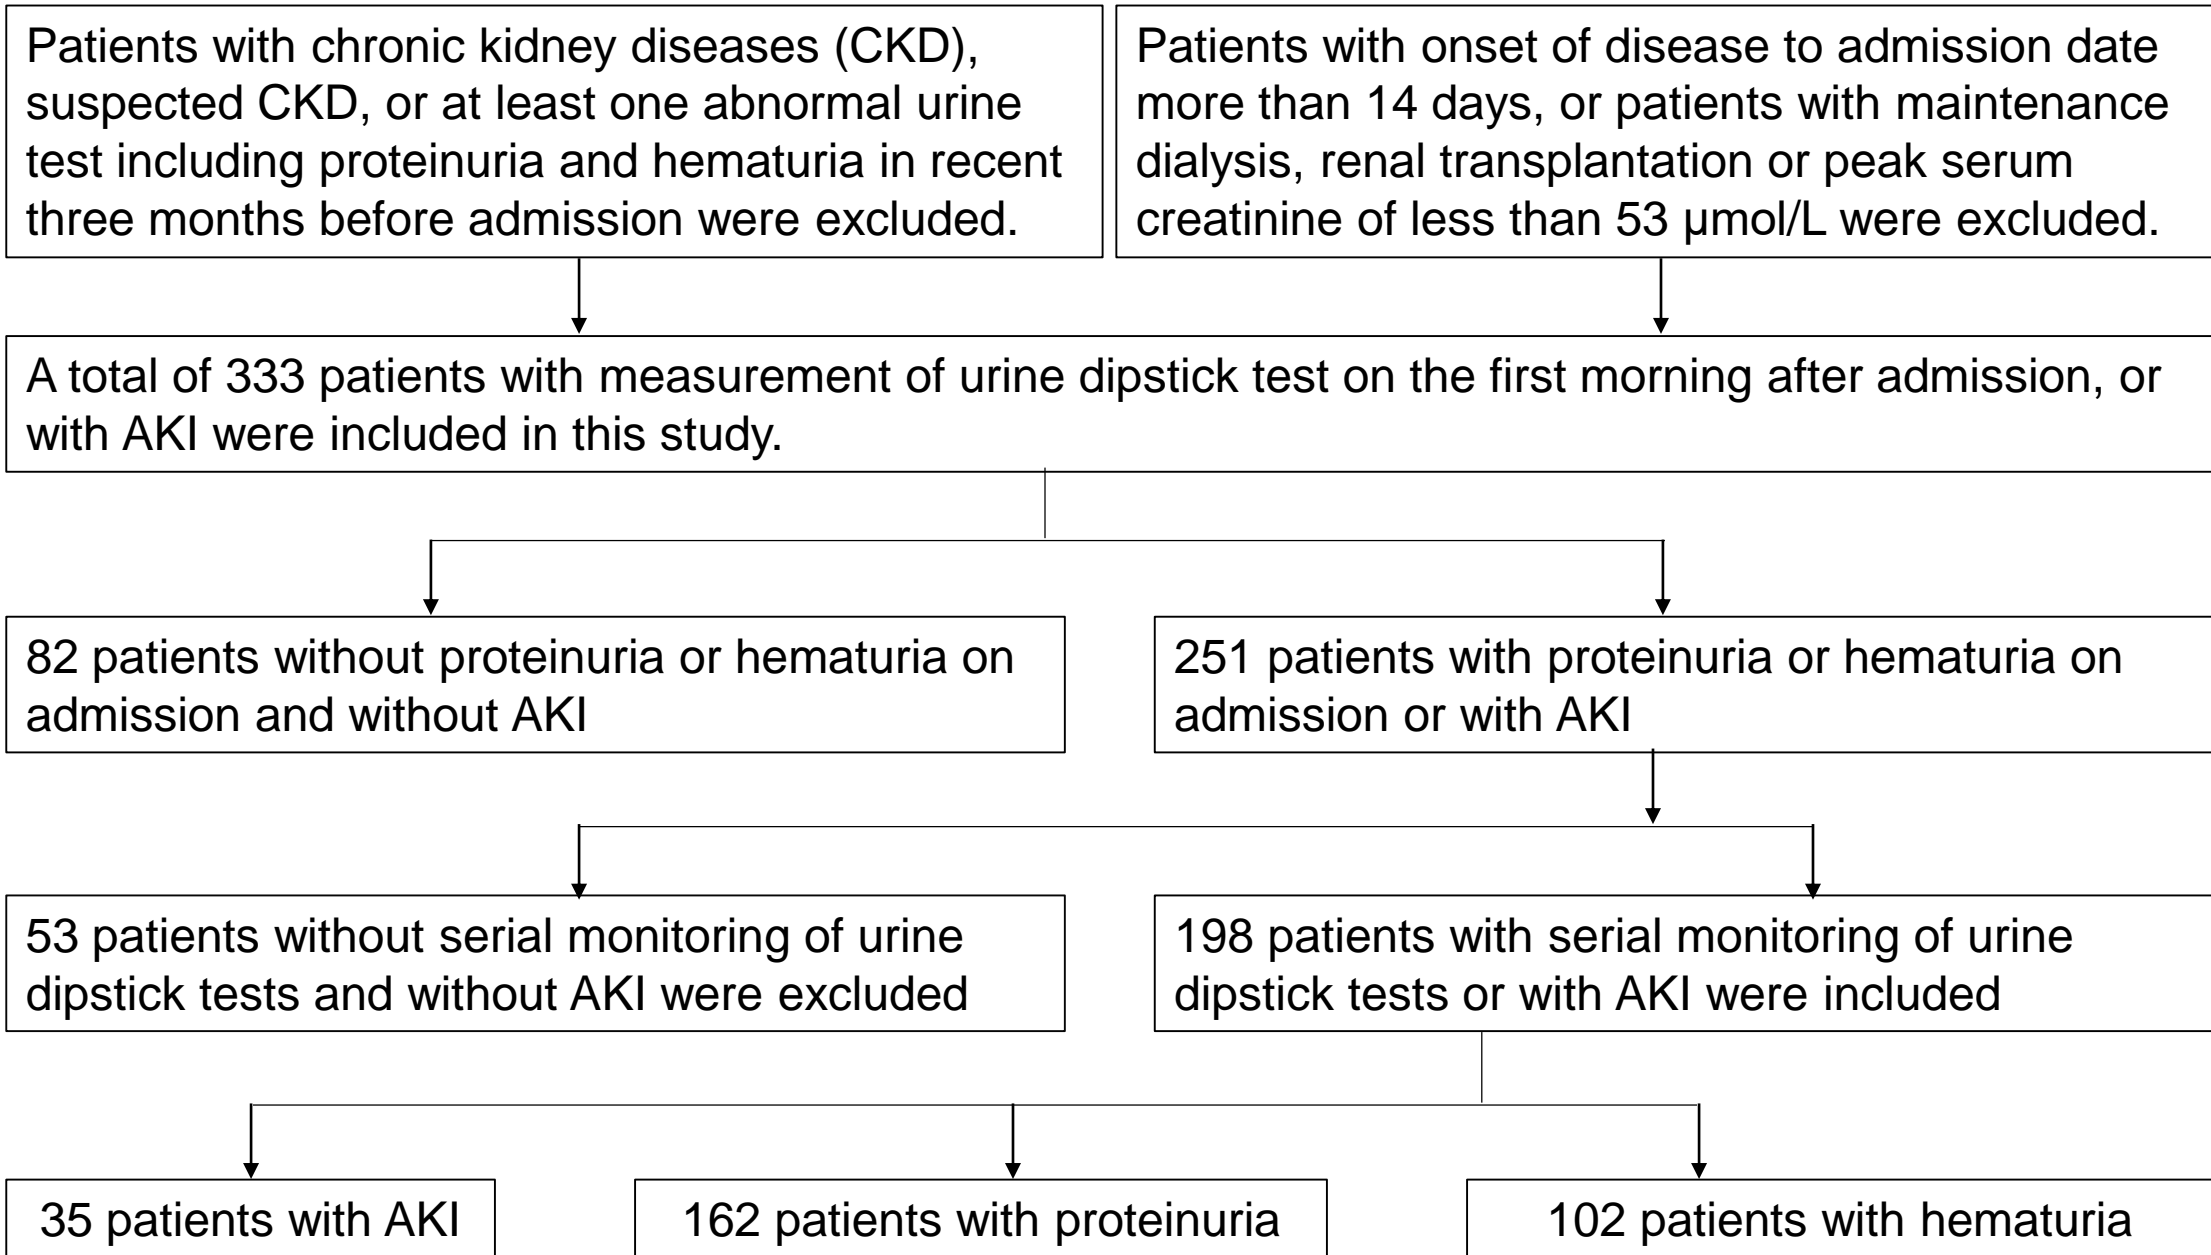

**Supplementary Figure 1. Schematic Figure**

### Outcome of proteinuria

$P < 0.001$

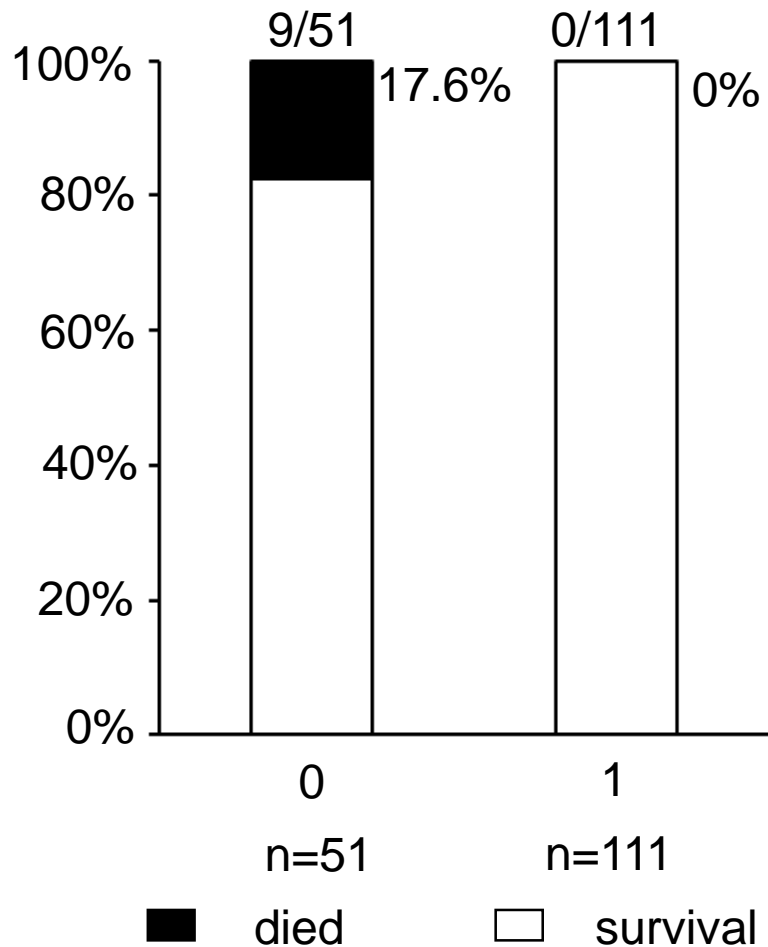

### Outcome of hematuria

$P < 0.001$

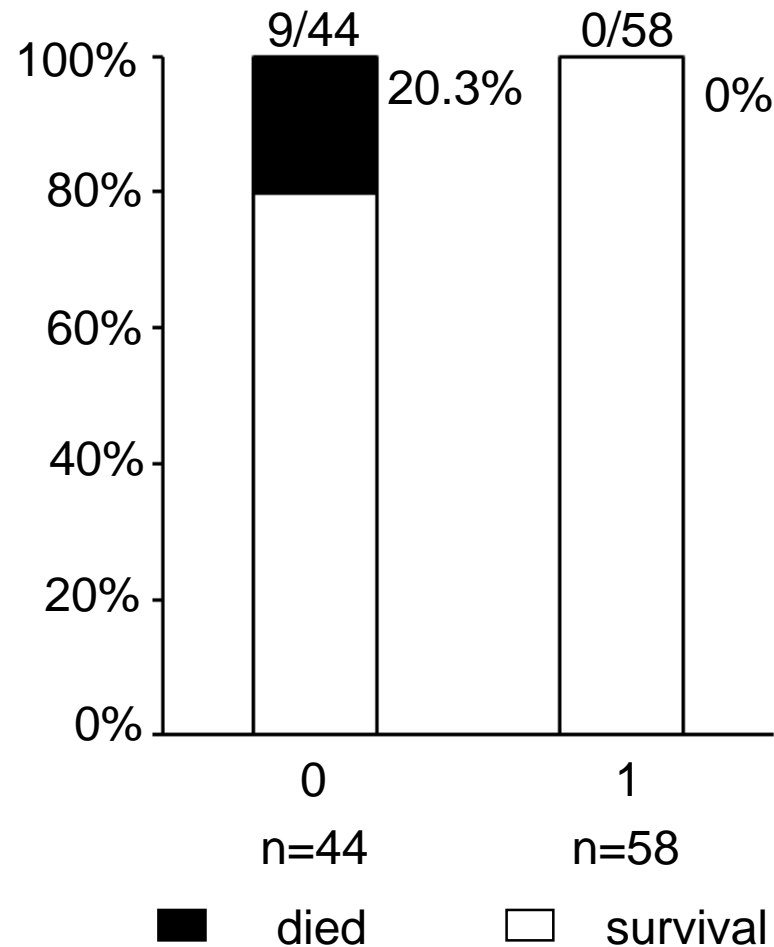

### Outcome of AKI

$P < 0.001$

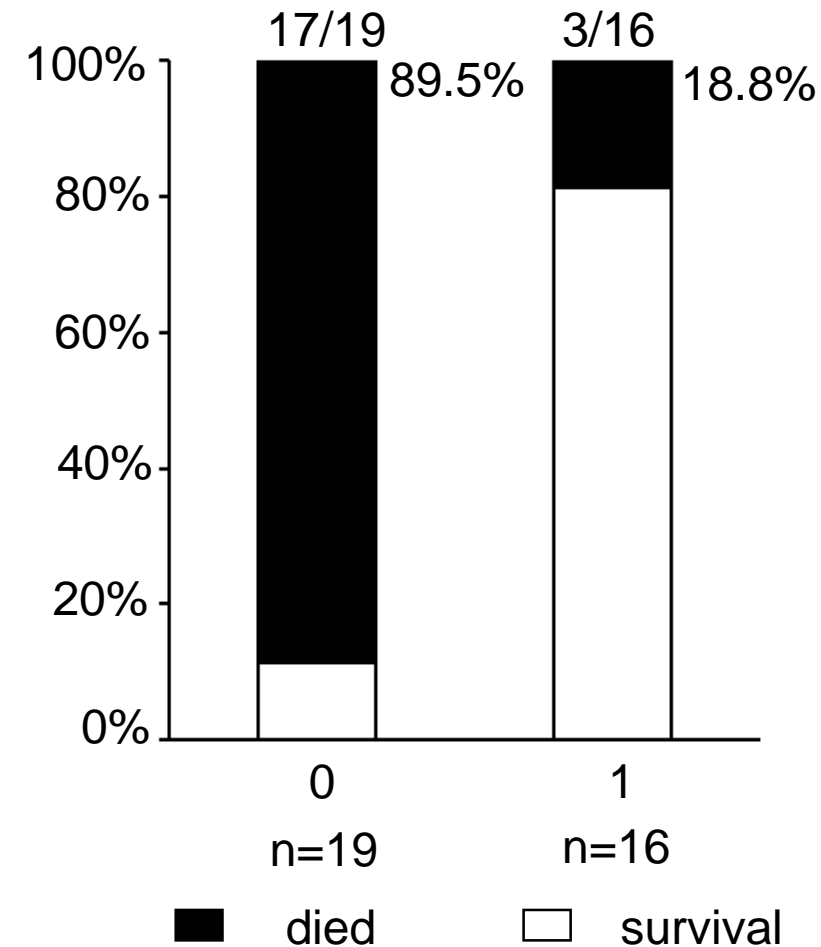

**Supplementary Figure 2. Relationship between outcomes of renal involvement and mortality during follow-up periods.** Results of Chi square test shows poor prognosis of proteinuria, hematuria and AKI and mortality were accompanied by higher mortality. For the outcome of proteinuria and hematuria, 0: deterioration or no remission; 1: remission, protein and hemoglobin were negative on serial monitoring of urine dipsticks test; for the outcome of AKI, 0: deterioration or no improvement of kidney function; 1: complete recovery of kidney function.
